# Supplementary material
Source: MDPI journal article supplement (https://www.mdpi.com/2076-3417/13/19/10839)
Supplement: s1 [file s1 › applsci-2611060-supplementary.pdf]

**Supplementary Materials Table S1.** The Critical Appraisal Checklists for Randomized Controlled Trials (RCTs) considered in the review. This table provides a comprehensive list of the criteria used to assess the quality and methodological rigor of the included RCTs in the review.

| Section A: Is the basic study design valid for a randomised controlled trial?                                                                                                                                                                                                                                                                                                                                                  |          |         |                 |                                    |
|--------------------------------------------------------------------------------------------------------------------------------------------------------------------------------------------------------------------------------------------------------------------------------------------------------------------------------------------------------------------------------------------------------------------------------|----------|---------|-----------------|------------------------------------|
| <b>1. Did the study address a clearly focused research question?</b><br><b>CONSIDER:</b> <ul style="list-style-type: none"> <li>Was the study designed to assess the outcomes of an intervention?</li> <li>Is the research question 'focused' in terms of: <ul style="list-style-type: none"> <li>Population studied</li> <li>Intervention given</li> <li>Comparator chosen</li> <li>Outcomes measured?</li> </ul> </li> </ul> | Yes<br>■ | No<br>□ | Can't tell<br>□ | <i>Horváth et al. 2011</i>         |
|                                                                                                                                                                                                                                                                                                                                                                                                                                | Yes<br>■ | No<br>□ | Can't tell<br>□ | <i>Kovács et al. 2012</i>          |
|                                                                                                                                                                                                                                                                                                                                                                                                                                | Yes<br>■ | No<br>□ | Can't tell<br>□ | <i>Fioravanti et al. 2014</i>      |
|                                                                                                                                                                                                                                                                                                                                                                                                                                | Yes<br>■ | No<br>□ | Can't tell<br>□ | <i>Kasapoğlu Aksoy et al. 2017</i> |
|                                                                                                                                                                                                                                                                                                                                                                                                                                | Yes<br>■ | No<br>□ | Can't tell<br>□ | <i>Gyarmati et al. 2017</i>        |
|                                                                                                                                                                                                                                                                                                                                                                                                                                | Yes<br>■ | No<br>□ | Can't tell<br>□ | <i>Benini et al. 2021</i>          |
|                                                                                                                                                                                                                                                                                                                                                                                                                                | Yes<br>■ | No<br>□ | Can't tell<br>□ | <i>Aksanyar et al. 2022</i>        |
| <b>2. Was the assignment of participants to interventions randomised?</b><br><b>CONSIDER:</b> <ul style="list-style-type: none"> <li>How was randomisation carried out? Was the method appropriate?</li> <li>Was randomisation sufficient to eliminate systematic bias?</li> <li>Was the allocation sequence concealed from investigators and participants?</li> </ul>                                                         | Yes<br>■ | No<br>□ | Can't tell<br>□ | <i>Horváth et al. 2011</i>         |
|                                                                                                                                                                                                                                                                                                                                                                                                                                | Yes<br>■ | No<br>□ | Can't tell<br>□ | <i>Kovács et al. 2012</i>          |
|                                                                                                                                                                                                                                                                                                                                                                                                                                | Yes<br>□ | No<br>■ | Can't tell<br>□ | <i>Fioravanti et al. 2014</i>      |
|                                                                                                                                                                                                                                                                                                                                                                                                                                | Yes<br>□ | No<br>■ | Can't tell<br>□ | <i>Kasapoğlu Aksoy et al. 2017</i> |
|                                                                                                                                                                                                                                                                                                                                                                                                                                | Yes<br>□ | No<br>■ | Can't tell<br>□ | <i>Gyarmati et al. 2017</i>        |
|                                                                                                                                                                                                                                                                                                                                                                                                                                | Yes<br>□ | No<br>■ | Can't tell<br>□ | <i>Benini et al. 2021</i>          |
|                                                                                                                                                                                                                                                                                                                                                                                                                                | Yes<br>□ | No<br>■ | Can't tell<br>□ | <i>Aksanyar et al. 2022</i>        |

Section B: Was the study methodologically sound?

|                                                                                                                                                                                                                                                                                                  |                                                                                                                                             |                                                                                                                      |                                                                                                                   |                                           |
|--------------------------------------------------------------------------------------------------------------------------------------------------------------------------------------------------------------------------------------------------------------------------------------------------|---------------------------------------------------------------------------------------------------------------------------------------------|----------------------------------------------------------------------------------------------------------------------|-------------------------------------------------------------------------------------------------------------------|-------------------------------------------|
| <p>4.</p> <ul style="list-style-type: none"> <li>• Were the participants 'blind' to intervention they were given?</li> <li>• Were the investigators 'blind' to the intervention they were giving to participants?</li> <li>• Were the people assessing/analysing outcome/s 'blinded'?</li> </ul> | <p>Yes</p> <p><input type="checkbox"/></p> <p><input checked="" type="checkbox"/></p> <p><input checked="" type="checkbox"/></p>            | <p>No</p> <p><input checked="" type="checkbox"/></p> <p><input type="checkbox"/></p> <p><input type="checkbox"/></p> | <p>Can't tell</p> <p><input type="checkbox"/></p> <p><input type="checkbox"/></p> <p><input type="checkbox"/></p> | <p><i>Horváth et al. 2011</i></p>         |
|                                                                                                                                                                                                                                                                                                  | <p>Yes</p> <p><input checked="" type="checkbox"/></p> <p><input checked="" type="checkbox"/></p> <p><input checked="" type="checkbox"/></p> | <p>No</p> <p><input type="checkbox"/></p> <p><input type="checkbox"/></p> <p><input type="checkbox"/></p>            | <p>Can't tell</p> <p><input type="checkbox"/></p> <p><input type="checkbox"/></p> <p><input type="checkbox"/></p> | <p><i>Kovács et al. 2012</i></p>          |
|                                                                                                                                                                                                                                                                                                  |                                                                                                                                             |                                                                                                                      |                                                                                                                   | <p><i>Fioravanti et al. 2014</i></p>      |
|                                                                                                                                                                                                                                                                                                  |                                                                                                                                             |                                                                                                                      |                                                                                                                   | <p><i>Kasapoğlu Aksoy et al. 2017</i></p> |
|                                                                                                                                                                                                                                                                                                  | <p>Yes</p> <p><input type="checkbox"/></p> <p><input checked="" type="checkbox"/></p> <p><input checked="" type="checkbox"/></p>            | <p>No</p> <p><input checked="" type="checkbox"/></p> <p><input type="checkbox"/></p> <p><input type="checkbox"/></p> | <p>Can't tell</p> <p><input type="checkbox"/></p> <p><input type="checkbox"/></p> <p><input type="checkbox"/></p> | <p><i>Gyarmati et al. 2017</i></p>        |
|                                                                                                                                                                                                                                                                                                  |                                                                                                                                             |                                                                                                                      |                                                                                                                   | <p><i>Benini et al. 2021</i></p>          |
|                                                                                                                                                                                                                                                                                                  |                                                                                                                                             |                                                                                                                      |                                                                                                                   | <p><i>Aksanyar et al. 2022</i></p>        |

|                                                                                                                                                                                                                                                                                                                                                                     |          |         |                 |                                    |
|---------------------------------------------------------------------------------------------------------------------------------------------------------------------------------------------------------------------------------------------------------------------------------------------------------------------------------------------------------------------|----------|---------|-----------------|------------------------------------|
| <p>5. Were the study groups similar at the start of the randomised controlled trial?<br/>CONSIDER:</p> <ul style="list-style-type: none"> <li>Were the baseline characteristics of each study group (e.g. age, sex, socio-economic group) clearly set out?</li> <li>Were there any differences between the study groups that could affect the outcome/s?</li> </ul> | Yes<br>■ | No<br>□ | Can't tell<br>□ | <i>Horváth et al. 2011</i>         |
|                                                                                                                                                                                                                                                                                                                                                                     | Yes<br>■ | No<br>□ | Can't tell<br>□ | <i>Kovács et al. 2012</i>          |
|                                                                                                                                                                                                                                                                                                                                                                     | Yes<br>■ | No<br>□ | Can't tell<br>□ | <i>Fioravanti et al. 2014</i>      |
|                                                                                                                                                                                                                                                                                                                                                                     | Yes<br>■ | No<br>□ | Can't tell<br>□ | <i>Kasapoğlu Aksoy et al. 2017</i> |
|                                                                                                                                                                                                                                                                                                                                                                     | Yes<br>■ | No<br>□ | Can't tell<br>□ | <i>Gyarmati et al. 2017</i>        |
|                                                                                                                                                                                                                                                                                                                                                                     | Yes<br>■ | No<br>□ | Can't tell<br>□ | <i>Benini et al. 2021</i>          |
|                                                                                                                                                                                                                                                                                                                                                                     | Yes<br>■ | No<br>□ | Can't tell<br>□ | <i>Aksanyar et al. 2022</i>        |

|                                                                                                                                                                                                                                                                                                                                                                                                                                                               |          |         |                 |                                    |
|---------------------------------------------------------------------------------------------------------------------------------------------------------------------------------------------------------------------------------------------------------------------------------------------------------------------------------------------------------------------------------------------------------------------------------------------------------------|----------|---------|-----------------|------------------------------------|
| <p>6. Apart from the experimental intervention, did each study group receive the same level of care (that is, were they treated equally)?</p> <p>CONSIDER:</p> <ul style="list-style-type: none"> <li>Was there a clearly defined study protocol?</li> <li>If any additional interventions were given (e.g. tests or treatments), were they similar between the study groups?</li> <li>Were the follow-up intervals the same for each study group?</li> </ul> | Yes<br>■ | No<br>□ | Can't tell<br>□ | <i>Horváth et al. 2011</i>         |
|                                                                                                                                                                                                                                                                                                                                                                                                                                                               | Yes<br>■ | No<br>□ | Can't tell<br>□ | <i>Kovács et al. 2012</i>          |
|                                                                                                                                                                                                                                                                                                                                                                                                                                                               | Yes<br>■ | No<br>□ | Can't tell<br>□ | <i>Fioravanti et al. 2014</i>      |
|                                                                                                                                                                                                                                                                                                                                                                                                                                                               | Yes<br>■ | No<br>□ | Can't tell<br>□ | <i>Kasapoğlu Aksoy et al. 2017</i> |
|                                                                                                                                                                                                                                                                                                                                                                                                                                                               | Yes<br>■ | No<br>□ | Can't tell<br>□ | <i>Gyarmati et al. 2017</i>        |
|                                                                                                                                                                                                                                                                                                                                                                                                                                                               | Yes<br>■ | No<br>□ | Can't tell<br>□ | <i>Benini et al. 2021</i>          |
|                                                                                                                                                                                                                                                                                                                                                                                                                                                               | Yes<br>■ | No<br>□ | Can't tell<br>□ | <i>Aksanyar et al. 2022</i>        |

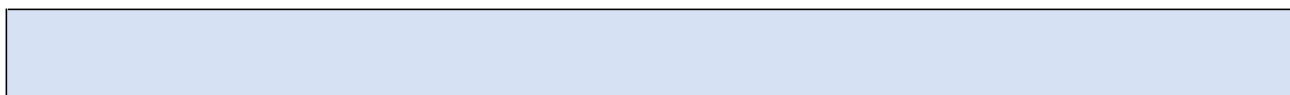

### Section C: What are the results?

|                                                                                                                                                                                                                                                                                                                                                                                                                                                                                                                                                                                                                                                                                                                                                               |          |         |                 |                             |
|---------------------------------------------------------------------------------------------------------------------------------------------------------------------------------------------------------------------------------------------------------------------------------------------------------------------------------------------------------------------------------------------------------------------------------------------------------------------------------------------------------------------------------------------------------------------------------------------------------------------------------------------------------------------------------------------------------------------------------------------------------------|----------|---------|-----------------|-----------------------------|
| <b>7. Were the effects of intervention reported comprehensively?</b><br><br><i>CONSIDER:</i> <ul style="list-style-type: none"> <li>Was a power calculation undertaken?</li> <li>What outcomes were measured, and were they clearly specified?</li> <li>How were the results expressed? For binary outcomes, were relative and absolute effects reported?</li> <li>Were the results reported for each outcome in each study group at each follow-up interval?</li> <li>Was there any missing or incomplete data?</li> <li>Was there differential drop-out between the study groups that could affect the results?</li> <li>Were potential sources of bias identified?</li> <li>Which statistical tests were used?</li> <li>Were p values reported?</li> </ul> | Yes<br>■ | No<br>□ | Can't tell<br>□ | Horváth et al. 2011         |
|                                                                                                                                                                                                                                                                                                                                                                                                                                                                                                                                                                                                                                                                                                                                                               | Yes<br>■ | No<br>□ | Can't tell<br>□ | Kovács et al. 2012          |
|                                                                                                                                                                                                                                                                                                                                                                                                                                                                                                                                                                                                                                                                                                                                                               | Yes<br>■ | No<br>□ | Can't tell<br>□ | Fioravanti et al. 2014      |
|                                                                                                                                                                                                                                                                                                                                                                                                                                                                                                                                                                                                                                                                                                                                                               | Yes<br>■ | No<br>□ | Can't tell<br>□ | Kasapoğlu Aksoy et al. 2017 |
|                                                                                                                                                                                                                                                                                                                                                                                                                                                                                                                                                                                                                                                                                                                                                               | Yes<br>■ | No<br>□ | Can't tell<br>□ | Gyarmati et al. 2017        |
|                                                                                                                                                                                                                                                                                                                                                                                                                                                                                                                                                                                                                                                                                                                                                               | Yes<br>■ | No<br>□ | Can't tell<br>□ | Benini et al. 2021          |
|                                                                                                                                                                                                                                                                                                                                                                                                                                                                                                                                                                                                                                                                                                                                                               | Yes<br>■ | No<br>□ | Can't tell<br>□ | Aksanyar et al. 2022        |
| <b>8. Was the precision of the estimate of the intervention or treatment effect reported?</b><br><br><i>CONSIDER:</i> <ul style="list-style-type: none"> <li>Were confidence intervals (CIs) reported?</li> </ul>                                                                                                                                                                                                                                                                                                                                                                                                                                                                                                                                             | Yes<br>■ | No<br>□ | Can't tell<br>□ | Horváth et al. 2011         |
|                                                                                                                                                                                                                                                                                                                                                                                                                                                                                                                                                                                                                                                                                                                                                               | Yes<br>■ | No<br>□ | Can't tell<br>□ | Kovács et al. 2012          |
|                                                                                                                                                                                                                                                                                                                                                                                                                                                                                                                                                                                                                                                                                                                                                               | Yes<br>■ | No<br>□ | Can't tell<br>□ | Fioravanti et al. 2014      |
|                                                                                                                                                                                                                                                                                                                                                                                                                                                                                                                                                                                                                                                                                                                                                               | Yes<br>■ | No<br>□ | Can't tell<br>□ | Kasapoğlu Aksoy et al. 2017 |
|                                                                                                                                                                                                                                                                                                                                                                                                                                                                                                                                                                                                                                                                                                                                                               | Yes<br>■ | No<br>□ | Can't tell<br>□ | Gyarmati et al. 2017        |
|                                                                                                                                                                                                                                                                                                                                                                                                                                                                                                                                                                                                                                                                                                                                                               | Yes<br>■ | No<br>□ | Can't tell<br>□ | Benini et al. 2021          |
|                                                                                                                                                                                                                                                                                                                                                                                                                                                                                                                                                                                                                                                                                                                                                               | Yes<br>■ | No<br>□ | Can't tell<br>□ | Aksanyar et al. 2022        |
| <b>9. Do the benefits of the experimental intervention outweigh the harms and costs?</b><br><br><i>CONSIDER:</i> <ul style="list-style-type: none"> <li>What was the size of the intervention or treatment effect?</li> <li>Were harms or unintended effects reported for each study group?</li> </ul>                                                                                                                                                                                                                                                                                                                                                                                                                                                        | Yes<br>□ | No<br>□ | Can't tell<br>■ | Horváth et al. 2011         |
|                                                                                                                                                                                                                                                                                                                                                                                                                                                                                                                                                                                                                                                                                                                                                               | Yes<br>□ | No<br>□ | Can't tell<br>■ | Kovács et al. 2012          |
|                                                                                                                                                                                                                                                                                                                                                                                                                                                                                                                                                                                                                                                                                                                                                               | Yes<br>□ | No<br>□ | Can't tell<br>■ | Fioravanti et al. 2014      |
|                                                                                                                                                                                                                                                                                                                                                                                                                                                                                                                                                                                                                                                                                                                                                               | Yes<br>□ | No<br>□ | Can't tell<br>■ | Kasapoğlu Aksoy et al. 2017 |
|                                                                                                                                                                                                                                                                                                                                                                                                                                                                                                                                                                                                                                                                                                                                                               | Yes<br>□ | No<br>□ | Can't tell<br>■ | Gyarmati et al. 2017        |
|                                                                                                                                                                                                                                                                                                                                                                                                                                                                                                                                                                                                                                                                                                                                                               | Yes<br>□ | No<br>□ | Can't tell<br>■ | Benini et al. 2021          |
|                                                                                                                                                                                                                                                                                                                                                                                                                                                                                                                                                                                                                                                                                                                                                               | Yes<br>□ | No<br>□ | Can't tell<br>■ |                             |

|                                                                                                                                                                                                                                                 |                                 |                                |                                                   |                      |
|-------------------------------------------------------------------------------------------------------------------------------------------------------------------------------------------------------------------------------------------------|---------------------------------|--------------------------------|---------------------------------------------------|----------------------|
| <ul style="list-style-type: none"> <li>Was a cost-effectiveness analysis undertaken? (Cost-effectiveness analysis allows a comparison to be made between different interventions used in the care of the same condition or problem.)</li> </ul> | Yes<br><input type="checkbox"/> | No<br><input type="checkbox"/> | Can't tell<br><input checked="" type="checkbox"/> | Aksanyar et al. 2022 |
|-------------------------------------------------------------------------------------------------------------------------------------------------------------------------------------------------------------------------------------------------|---------------------------------|--------------------------------|---------------------------------------------------|----------------------|

#### Section D: Will the results help locally?

|                                                                                                                                                                                                                                                                                                                                                                                                                                                                                                                                                                                                                      |                                            |                                |                                                   |                             |
|----------------------------------------------------------------------------------------------------------------------------------------------------------------------------------------------------------------------------------------------------------------------------------------------------------------------------------------------------------------------------------------------------------------------------------------------------------------------------------------------------------------------------------------------------------------------------------------------------------------------|--------------------------------------------|--------------------------------|---------------------------------------------------|-----------------------------|
| <b>10.</b><br><b>Can the results be applied to your local population/in your context?</b><br><br><i>CONSIDER:</i> <ul style="list-style-type: none"> <li>Are the study participants similar to the people in your care?</li> <li>Would any differences between your population and the study participants alter the outcomes reported in the study?</li> <li>Are the outcomes important to your population?</li> <li>Are there any outcomes you would have wanted information on that have not been studied or reported?</li> <li>Are there any limitations of the study that would affect your decision?</li> </ul> | Yes<br><input checked="" type="checkbox"/> | No<br><input type="checkbox"/> | Can't tell<br><input type="checkbox"/>            | Horváth et al. 2011         |
|                                                                                                                                                                                                                                                                                                                                                                                                                                                                                                                                                                                                                      | Yes<br><input checked="" type="checkbox"/> | No<br><input type="checkbox"/> | Can't tell<br><input type="checkbox"/>            | Kovács et al. 2012          |
|                                                                                                                                                                                                                                                                                                                                                                                                                                                                                                                                                                                                                      | Yes<br><input checked="" type="checkbox"/> | No<br><input type="checkbox"/> | Can't tell<br><input type="checkbox"/>            | Fioravanti et al. 2014      |
|                                                                                                                                                                                                                                                                                                                                                                                                                                                                                                                                                                                                                      | Yes<br><input checked="" type="checkbox"/> | No<br><input type="checkbox"/> | Can't tell<br><input type="checkbox"/>            | Kasapoğlu Aksoy et al. 2017 |
|                                                                                                                                                                                                                                                                                                                                                                                                                                                                                                                                                                                                                      | Yes<br><input checked="" type="checkbox"/> | No<br><input type="checkbox"/> | Can't tell<br><input type="checkbox"/>            | Gyarmati et al. 2017        |
|                                                                                                                                                                                                                                                                                                                                                                                                                                                                                                                                                                                                                      | Yes<br><input checked="" type="checkbox"/> | No<br><input type="checkbox"/> | Can't tell<br><input type="checkbox"/>            | Benini et al. 2021          |
|                                                                                                                                                                                                                                                                                                                                                                                                                                                                                                                                                                                                                      | Yes<br><input checked="" type="checkbox"/> | No<br><input type="checkbox"/> | Can't tell<br><input type="checkbox"/>            | Aksanyar et al. 2022        |
| <b>11.</b><br><b>Would the experimental intervention provide greater value to the people in your care than any of the existing interventions?</b><br><br><i>CONSIDER:</i> <ul style="list-style-type: none"> <li>What resources are needed to introduce this intervention taking into account time, finances, and</li> </ul>                                                                                                                                                                                                                                                                                         | Yes<br><input type="checkbox"/>            | No<br><input type="checkbox"/> | Can't tell<br><input checked="" type="checkbox"/> | Horváth et al. 2011         |
|                                                                                                                                                                                                                                                                                                                                                                                                                                                                                                                                                                                                                      | Yes<br><input type="checkbox"/>            | No<br><input type="checkbox"/> | Can't tell<br><input checked="" type="checkbox"/> | Kovács et al. 2012          |
|                                                                                                                                                                                                                                                                                                                                                                                                                                                                                                                                                                                                                      | Yes<br><input type="checkbox"/>            | No<br><input type="checkbox"/> | Can't tell<br><input checked="" type="checkbox"/> | Fioravanti et al. 2014      |
|                                                                                                                                                                                                                                                                                                                                                                                                                                                                                                                                                                                                                      | Yes<br><input type="checkbox"/>            | No<br><input type="checkbox"/> | Can't tell<br><input checked="" type="checkbox"/> | Kasapoğlu Aksoy et al. 2017 |
|                                                                                                                                                                                                                                                                                                                                                                                                                                                                                                                                                                                                                      | Yes<br><input type="checkbox"/>            | No<br><input type="checkbox"/> | Can't tell<br><input checked="" type="checkbox"/> | Gyarmati et al. 2017        |
|                                                                                                                                                                                                                                                                                                                                                                                                                                                                                                                                                                                                                      | Yes<br><input type="checkbox"/>            | No<br><input type="checkbox"/> | Can't tell<br><input checked="" type="checkbox"/> | Benini et al. 2021          |
|                                                                                                                                                                                                                                                                                                                                                                                                                                                                                                                                                                                                                      | Yes<br><input type="checkbox"/>            | No<br><input type="checkbox"/> | Can't tell<br><input type="checkbox"/>            | Aksanyar et al. 2022        |

|                                                                                                                                                                                                                                                  |                                                                                                                        |  |
|--------------------------------------------------------------------------------------------------------------------------------------------------------------------------------------------------------------------------------------------------|------------------------------------------------------------------------------------------------------------------------|--|
| <p><i>skills development or training needs?</i></p> <ul style="list-style-type: none"><li>• <i>Are you able to disinvest resources in one or more existing interventions in order to be able to re-invest in the new intervention?</i></li></ul> | <div><input type="checkbox"/></div> <div><input type="checkbox"/></div> <div><input checked="" type="checkbox"/></div> |  |
|--------------------------------------------------------------------------------------------------------------------------------------------------------------------------------------------------------------------------------------------------|------------------------------------------------------------------------------------------------------------------------|--|
